# Supplementary material for: Clinical, radiological and molecular characterization of intramedullary astrocytomas
Source: PubMed Central journal article supplement (PMC7414698; doi:10.1186/s40478-020-00962-1), 2020-08-08
Supplement: 40478_2020_962_MOESM1_ESM.pdf [file 40478_2020_962_MOESM1_ESM.pdf]

**Supplementary Table S1.** List of genes, copy number variations (CNV) and *KIAA1549-BRAF* fusions tested

| DNA-based panels |              |                                             |                      |                                             |                     |
|------------------|--------------|---------------------------------------------|----------------------|---------------------------------------------|---------------------|
| Gene             | RefSeq       | Research panel (30-gene panel) <sup>1</sup> |                      | Clinical panel (16-gene panel) <sup>2</sup> |                     |
|                  |              | Target                                      | Overall Coverage (%) | Target                                      | CNV targeted        |
| <i>ACVR1</i>     | NM_0011105   | -                                           | -                    | Hotspots in exons 6, 7, 8, 9                | -                   |
| <i>ATRX</i>      | NM_000489    | Whole coding sequence, exons 1-35           | 95,9                 | Whole coding sequence, exons 1-35           | -                   |
| <i>BRAF</i>      | NM_004333    | Whole coding sequence, exons 1-18           | 94,6                 | Hotspots in exons 7, 10, 11, 15             | -                   |
| <i>CDKN2A</i>    | NM_000077    | Whole coding sequence, exons 1-3            | 50,9                 | Whole coding sequence, exons 1-3            | Homozygous deletion |
| <i>CDKN2B</i>    | NM_004936    | Whole coding sequence, exons 1-2            | 64,7                 | -                                           | -                   |
| <i>CIC</i>       | NM_015125    | Whole coding sequence, exons 1-20           | 90,4                 | -                                           | -                   |
| <i>DAXX</i>      | NM_001141970 | Whole coding sequence, exons 1-8            | 90,1                 | -                                           | -                   |
| <i>EGFR</i>      | NM_005228    | Whole coding sequence, exons 1-28           | 99,9                 | Whole coding sequence, exons 1-28           | Amplification       |
| <i>FOXR2</i>     | NM_198451    | Whole coding sequence, exon 1               | 100,0                | -                                           | -                   |
| <i>FUBP1</i>     | NM_003902    | Whole coding sequence, exons 1-20           | 98,8                 | -                                           | -                   |
| <i>H3F3A</i>     | NM_002107    | Whole coding sequence, exons 2-3            | 63,7                 | Hotspot in exon 2                           | -                   |
| <i>HIST1H3B</i>  | NM_003537    | Whole coding sequence, exon 1               | 95,2                 | Hotspot in exon 1                           | -                   |
| <i>HIST1H3C</i>  | NM_003531    | Whole coding sequence, exon 1               | -                    | Hotspot in exon 1                           | -                   |
| <i>IDH1</i>      | NM_005896    | Whole coding sequence, exons 3-10           | 97,7                 | Hotspot in exon 4                           | -                   |
| <i>IDH2</i>      | NM_002168.2  | Whole coding sequence, exons 2-11           | 90,8                 | Hotspot in exon 4                           | -                   |
| <i>KEL</i>       | NM_000420    | Whole coding sequence, exons 1-19           | 99,3                 | -                                           | -                   |
| <i>KRAS</i>      | NM_033360    | Whole coding sequence, exons 2-6            | 90,3                 | -                                           | -                   |
| <i>LZTR1</i>     | NM_006767    | Whole coding sequence, exons 1-21           | 96,2                 | -                                           | -                   |
| <i>MET</i>       | NM_001127500 | Whole coding sequence, exons 2-21           | 98,9                 | -                                           | -                   |
| <i>MSH6</i>      | NM_000179    | Whole coding sequence, exons 1-10           | 94,8                 | -                                           | -                   |
| <i>NF1</i>       | NM_001042492 | Whole coding sequence, exons 1-58           | 98,5                 | -                                           | -                   |
| <i>NOP53</i>     | NM_015710    | Whole coding sequence, exons 1-13           | 72,0                 | -                                           | -                   |
| <i>PDGFRA</i>    | NM_006206    | Whole coding sequence, exons 2-23           | 100,0                | Exons 5-12, 14-15, 18, 21-23                | Amplification       |
| <i>PIK3CA</i>    | NM_006218    | Whole coding sequence, exons 2-21           | 96,9                 | -                                           | -                   |
| <i>PIK3R1</i>    | NM_181523    | Whole coding sequence, exons 2-16           | 98,4                 | -                                           | -                   |
| <i>PTEN</i>      | NM_000314    | Whole coding sequence, exons 1-9            | 95,7                 | Whole coding sequence, exons 1-9            | -                   |
| <i>QKI</i>       | NM_006775    | Whole coding sequence, exons 1-8            | 98,6                 | -                                           | -                   |
| <i>RBI</i>       | NM_000321    | Whole coding sequence, exons 1-27           | 93,1                 | -                                           | -                   |
| <i>TERT</i>      | NM_001193376 | -                                           | -                    | Hotspot in promoter region                  | -                   |
| <i>TP53</i>      | NM_000546    | Whole coding sequence, exons 2-11           | 100,0                | Whole coding sequence, exons 2-11           | -                   |
| <i>TP73</i>      | NM_005427    | Whole coding sequence, exons 2-14           | 86,0                 | -                                           | -                   |
| <i>TSC1</i>      | NM_000368    | Whole coding sequence, exons 3-23           | 94,8                 | -                                           | -                   |
| <i>TSC2</i>      | NM_000548    | Whole coding sequence, exons 2-42           | 96,8                 | -                                           | -                   |
| <i>Chr 1p</i>    | -            | -                                           | -                    | -                                           | Codeletion          |
| <i>Chr19q</i>    | -            | -                                           | -                    | -                                           | Codeletion          |

| RNA-based panel                |          |
|--------------------------------|----------|
| Fusion                         | COSMIC   |
| <i>KIAA1549(19) - BRAF(9)</i>  | COSF511  |
| <i>KIAA1549(18) - BRAF(10)</i> | COSF509  |
| <i>KIAA1549(17) - BRAF(10)</i> | COSF509  |
| <i>KIAA1549(16) - BRAF(10)</i> | COSF1283 |
| <i>KIAA1549(16) - BRAF(11)</i> | COSF485  |
| <i>KIAA1549(16) - BRAF(9)</i>  | COSF481  |
| <i>KIAA1549(17) - BRAF(10)</i> | COSF1284 |
| <i>KIAA1549(15) - BRAF(11)</i> | COSF1226 |
| <i>KIAA1549(15) - BRAF(9)</i>  | COSF483  |
| <i>KIAA1549(13) - BRAF(9)</i>  | COSF1474 |

<sup>1</sup> Cantero D, Rodríguez de Lope Á, Moreno de la Presa R, Sepúlveda JM, Borrás JM, Castresana JS, D'Haene N, García JF, Salmon I, Mollejo M, Rey JA, Hernández-Lain A, Meléndez B (2018) Molecular Study of Long-Term Survivors of Glioblastoma by Gene-Targeted Next-Generation Sequencing. *J Neuropathol Exp Neurol* 77:710–716. doi: 10.1093/jnen/nly048

<sup>2</sup> D'Haene N, Meléndez B, Blanchard O, De Nève N, Lebrun L, Van Campenhout C, Salmon I (2019) Design and Validation of a Gene-Targeted, Next-Generation Sequencing Panel for Routine Diagnosis in Gliomas. *Cancers (Basel)* 11. doi: 10.3390/cancers11060773
