# Supplementary material for: Clinical, radiological and molecular characterization of intramedullary astrocytomas
Source: PubMed Central journal article supplement (PMC7414698; doi:10.1186/s40478-020-00962-1), 2020-08-08
Supplement: 40478_2020_962_MOESM2_ESM.pdf [file 40478_2020_962_MOESM2_ESM.pdf]

**Supplementary Table S2: Prognosis Model for all cases**

Multivariate analysis for Overall Survival (OS) and Event-Free Survival (EFS)

|               | Variables                | Hazard Ratio <sup>1</sup> | 95% CI         | p-value         |
|---------------|--------------------------|---------------------------|----------------|-----------------|
| <b>a. OS</b>  | High Grade (no/yes)      | 29,6                      | (6.75-129.870) | <b>0,000007</b> |
|               | Biopsy (no/yes)          | 2,67                      | (0.693-10.023) | 0,155           |
| <b>b. EFS</b> | High Grade (no/yes)      | 14,06                     | (4.715-41.916) | <b>0,000002</b> |
|               | Biopsy (no/yes)          | 3,76                      | (1.559-9.044)  | <b>0,003</b>    |
|               | Total Resection (no/yes) | 0,53                      | (0.116-2.403)  | 0,408           |

<sup>1</sup>for "yes" category. NB: The total resection variable could not be included for the OS because of problem of singular matrix decomposition for estimating model parameters.
