# Supplementary material for: Clinical, radiological and molecular characterization of intramedullary astrocytomas
Source: PubMed Central journal article supplement (PMC7414698; doi:10.1186/s40478-020-00962-1), 2020-08-08
Supplement: 40478_2020_962_MOESM3_ESM.pdf [file 40478_2020_962_MOESM3_ESM.pdf]

**Supplementary Table S3** : Event-Free Survival (EFS) Prognosis Model for LG cases (grade I and grade II only)

| Multivariate analysis of EFS |                           |                |              |
|------------------------------|---------------------------|----------------|--------------|
| Variables                    | Hazard Ratio <sup>1</sup> | 95% CI         | p-value      |
| Grade II (no/yes)            | 1,7                       | (0.534-5.390)  | 0,37         |
| Biopsy (no/yes)              | 4,94                      | (1.501-16.223) | <b>0,009</b> |
| Total Resection (no/yes)     | 0,42                      | (0.049-3.603)  | 0,429        |

<sup>1</sup>for "yes" category
