# Supplementary material for: Clinical, radiological and molecular characterization of intramedullary astrocytomas
Source: PubMed Central journal article supplement (PMC7414698; doi:10.1186/s40478-020-00962-1), 2020-08-08
Supplement: 40478_2020_962_MOESM4_ESM.pdf [file 40478_2020_962_MOESM4_ESM.pdf]

**Supplementary Table S4: Prognosis Model including molecular data for all cases****Multivariate analysis for Overall Survival (OS) and Event-Free Survival (EFS)**

|               | Variables                             | Hazard Ratio <sup>1</sup> | 95% CI        | p-value         |
|---------------|---------------------------------------|---------------------------|---------------|-----------------|
| <b>a. OS</b>  | Biopsy (no/yes)                       | 1,28                      | (0.34-4.85)   | 0,72            |
|               | H3K27M mutation (no/yes)              | 72,78                     | (8.61-615.12) | <b>0,000083</b> |
| <b>b. EFS</b> | Biopsy (no/yes)                       | 3,69                      | (1.46-9.32)   | <b>0,0058</b>   |
|               | <i>KIAA1549-BRAF</i> fusions (no/yes) | 0,83                      | (0.18-3.80)   | 0,8075          |
|               | H3K27M mutation (no/yes)              | 10,52                     | (2.76-40.05)  | <b>0,0006</b>   |

<sup>1</sup>for "yes" category
