# Supplementary material for: Clinical, radiological and molecular characterization of intramedullary astrocytomas
Source: PubMed Central journal article supplement (PMC7414698; doi:10.1186/s40478-020-00962-1), 2020-08-08
Supplement: 40478_2020_962_MOESM5_ESM.pdf [file 40478_2020_962_MOESM5_ESM.pdf]

**Supplementary Table S5:** Event-free Survival (EFS) Prognosis Model including molecular data for grade I pilocytic and grade II diffuse intramedullary astrocytomas

| Multivariate analysis of EFS          |                           |              |               |
|---------------------------------------|---------------------------|--------------|---------------|
| Variables                             | Hazard Ratio <sup>1</sup> | 95% CI       | p-value       |
| Biopsy (no/yes)                       | 15,31                     | (3.74-62.73) | <b>0,0002</b> |
| <i>KIAA1549-BRAF</i> fusions (no/yes) | 1,55                      | (0.31-7.81)  | 0,593         |

<sup>1</sup>for "yes" category
